# Supplementary material for: DksA–DnaJ redox interactions provide a signal for the activation of bacterial RNA polymerase
Source: PubMed Central journal article supplement — Proc Natl Acad Sci U S A. 2018 Nov 14;115(50):E11780–9. doi: 10.1073/pnas.1813572115 (PMC6294903; doi:10.1073/pnas.1813572115), 2018-11-14
Supplement: pnas.1813572115.sapp.pdf [file pnas.1813572115.sapp.pdf]

1  
2  
3 **Supplementary information for: DksA-DnaJ redox interactions provide a signal for the**  
4 **activation of bacterial RNA polymerase**

5  
6 Ju-Sim Kim, Lin Liu, Liam F. Fitzsimmons, Yang Wang, Matthew A. Crawford, Mauricio  
7 Mastrogiovanni, Madia Trujillo, James K. Till, Rafael Radi, Shaodong Dai, and Andrés  
8 Vázquez-Torres  
9

10 Corresponding authors:  
11 andres.vazquez-torres@ucdenver.edu  
12 rradi@fmed.edu.uy  
13

14 **This PDF includes:**

15  
16 **Supplementary Materials and Methods**

17 **Table S1. DksA partner molecules identified by mass spectrometric analysis.**

18 **Table S2. Zinc and thiol content of purified DnaJ protein variants in 8 M urea.**

19 **Table S3. Bacterial strains used in this study.**

20 **Table S4. Plasmids used in this study.**

21 **Table S5. Oligonucleotides used in this study.**

22 **Fig. S1. Recombinant DnaJ and DksA proteins and biochemical pull-down assay.**

23 **Fig. S2. Zinc content of recombinant DksA variants.**

24 **Fig. S3. Characterization of recombinant DnaJ and determination of DksA**  
25 **remetallation and redox state in aerobic cultures.**

26 **Fig. S4. *In-gel* digestion-HPLC-MS and redox analysis of DksA.**

27 **Fig. S5. Characterization of *Salmonella* strains expressing *dnaJ* variants.**

28 **Fig. S6. Transcription of *hisG* in *Salmonella* and purification of RNA polymerase from**  
29 ***Salmonella*.**

30 **Fig. S7. Effects of tetracycline on H<sub>2</sub>O<sub>2</sub>-stimulated ppGpp synthesis.**

34 **Supplementary Materials and Methods.**

35

36 **Remetallation assays.** Zinc-deficient DksA was prepared by treating DksA with 1 mM  
37 methyl methanethiosulfonate (MMTS), in the presence of 0.1 mM  
38 diethylenetriaminepentaacetic acid (DTPA), for 30 minutes at room temperature in a Bactron  
39 I anaerobic chamber. After incubation, an aliquot from the reaction was set aside to confirm  
40 zinc chelation. Excess MMTS and zinc chelates were removed from the remaining reaction  
41 volume by double exchange into degassed 50 mM potassium phosphate buffer, pH 7.0  
42 using Zeba Spin desalting columns. Zinc-deficient, MMTS-modified DksA was subsequently  
43 reduced by treatment with 10 mM (final) DTT for 1 h at room temperature under an  
44 anaerobic environment. DTT was then removed by double exchange into degassed 50 mM  
45 potassium phosphate buffer, pH 7.0. Following exchange, an aliquot of reduced, zinc-  
46 deficient DksA was removed from the anaerobic chamber to measure the protein  
47 concentration using the Pierce 660 reagent. The protein concentration of zinc-containing  
48 DnaJ was determined in parallel. In the anaerobic chamber, reduced, zinc-deficient DksA  
49 and zinc-containing DnaJ were combined at a 1:1 molar ratio, and this mixture was  
50 incubated for 1 h at 37°C.

51

52 Replicate aliquots (25  $\mu$ l) from the prepared samples (reduced, zinc-containing DksA;  
53 reduced, zinc-deficient DksA; reduced, zinc-deficient DksA + zinc-containing DnaJ; and zinc-  
54 containing DnaJ) were removed from the anaerobic chamber and treated with ONOO<sup>-</sup> (570  
55  $\mu$ M, final), prepared in ice-cold 10 mM NaOH, for 5 minutes at 37°C or urea (5.7 M) for 15  
56 minutes at 95°C. Zinc release was subsequently quantified by spectrometry (OD<sub>500</sub>) using  
57 150  $\mu$ M (final) of the metallochromic indicator 4-(2-pyridylazo) resorcinol (PAR). Zinc  
58 concentrations were calculated from standard curves prepared using ZnCl<sub>2</sub> standards in the  
59 presence of ONOO<sup>-</sup> or urea, as appropriate. ONOO<sup>-</sup> was synthesized with H<sub>2</sub>O<sub>2</sub> and  
60 acidified nitrite (1)

61

62 **Growth in minimal medium.** Strains grown overnight in LB at 37°C were diluted 1:100 in  
63 EG minimal media (0.2% MgSO<sub>4</sub>, 2% C<sub>6</sub>H<sub>8</sub>O<sub>7</sub>·H<sub>2</sub>O, 10% K<sub>2</sub>HPO<sub>4</sub>, 3.5% Na(NH<sub>4</sub>)HPO<sub>4</sub>·4H<sub>2</sub>O,  
64 and 4% D-glucose, pH 5.5) and incubated at 37°C. Cell growth was determined by following  
65 OD<sub>600</sub> over time.

66

67 **Heat shock response.** Strains grown overnight in LB broth at 37°C were sub-cultured 1:100  
68 in LB broth. The specimens were incubated at 37°C to 45°C. Bacterial growth was  
69 determined by recording cfu over time.

70

71 **Detection of DksA and DnaJ in immunoblots.** Wild-type and *ΔdnaJ Salmonella*  
72 expressing the *dksA::FLAG* were grown in LB broth at 37°C overnight, harvested, washed in  
73 PBS buffer, and resuspended in PBS buffer at an OD<sub>600</sub> of 0.3. Where indicated, the  
74 bacterial cells were treated with 100 μM H<sub>2</sub>O<sub>2</sub> at 37°C. After 30 min of incubation with  
75 shaking, the bacteria were harvested for Western blot analysis. In addition, stationary  
76 phase *Salmonella* subcultured 1:100 in LB broth were grown to an OD<sub>600</sub> of 0.5-0.7. Cells  
77 were disrupted by an ultrasonication liquid process, and protein concentrations were  
78 determined by BCA (Thermo Fisher Scientific). Samples were separated on 12% SDS-  
79 PAGE gels, and the proteins were transferred onto nitrocellulose membranes by electro-  
80 transfer. Blots were probed with anti-FLAG monoclonal (Sigma-Aldrich, Burlington, MA) or  
81 anti-DnaJ polyclonal (Enzo, Farmingdale, NY) antibodies, followed by HRP-conjugated anti-  
82 mouse IgG or anti-rabbit IgG antibodies (GE Healthcare), respectively. Immunoblots were  
83 developed as recommended using the ECL prime Western blotting detection system (GE  
84 Healthcare), and imaged with a ChemiDoc XRS imaging system (Bio-Rad, Hercules, CA).  
85 As a control, DnaK was detected with anti-DnaK monoclonal antibodies (MBL International,  
86 Woburn, MA) followed by HRP-conjugated anti-mouse IgG (GE Healthcare).

87

88 **Measurement of (p)ppGpp.** Bacterial strains were grown to OD<sub>600</sub> of approximately 0.2 (1.5  
89 doubling times) in MOPS minimal media containing glucose, all amino acids, 0.4 mM  
90 K<sub>2</sub>HPO<sub>4</sub>, and 10 μCi/mL of [<sup>32</sup>P]-labeled orthophosphate. Cells were treated with 10-25 μM  
91 H<sub>2</sub>O<sub>2</sub> or 70 μg/ml tetracycline before 0.4 ml of ice-cold 50% formic acid was added to the  
92 cultures. Extracts were incubated on ice for at least 20 min and the specimens were  
93 centrifuged at 13,000 rpm for 5 min. Ten μl of ice-cold extracts were spotted along the  
94 bottom of polyethyleneimine-cellulose thin layer chromatography (TLC) plates (20 x 20 cm;  
95 EDM Millipore, Billerica, MA). Plates were air-dried and the nucleotides were separated for 1  
96 h with a 1.25 M K<sub>2</sub>HPO<sub>4</sub> solvent system, pH 3.4, in a TLC chamber. TLC autoradiograms  
97 were visualized with phosphor screens and a phosphorimager (Bio-Rad, Hercules, CA).  
98 Relative nucleotide levels were quantified with the ImageJ software (NIH, Rockville, MD).

99

100

101

102 **Table S1. DksA partner molecules identified by mass spectrometric analysis.**

| 103 | Protein     | Description                                               |
|-----|-------------|-----------------------------------------------------------|
| 104 |             |                                                           |
| 105 | <b>RpoC</b> | RNA polymerase $\beta'$                                   |
| 106 | <b>RpoB</b> | RNA polymerase $\beta'$                                   |
| 107 | <b>NusA</b> | Modifies transcription through interactions with RNA      |
| 108 |             | polymerase; impacts elongation, readthrough, termination, |
| 109 |             | and anti-termination                                      |
| 110 | <b>Tig</b>  | Trigger factor, promotes folding of newly synthesized     |
| 111 |             | proteins                                                  |
| 112 | <b>DnaJ</b> | Chaperone protein                                         |
| 113 | <b>RpoA</b> | RNA polymerase $\alpha$                                   |
| 114 | <b>RfaD</b> | ADP-L-glycero-D-mannoheptose-6-epimerase                  |
| 115 | <b>SegA</b> | negative modulator of the initiation of chromosome        |
| 116 |             | replication                                               |
| 117 | <b>StpA</b> | 15 kDa of DNA binding protein                             |
| 118 | <b>HupA</b> | 10 kDa of DNA-binding protein HU- $\alpha$                |
| 119 |             |                                                           |

120

121

122 **Table S2. Zinc and thiol content of purified DnaJ protein variants in 8 M urea.**  
123

| 124 | Protein    | Zinc release ( $\mu\text{M}$ ) | Thiol content ( $\mu\text{M}$ ) |
|-----|------------|--------------------------------|---------------------------------|
| 126 | WT DnaJ    | $10.55 \pm 0.71$               | $49.27 \pm 0.78$                |
| 127 | DnaJ C186H | $11.02 \pm 0.35$               | $43.52 \pm 0.13$                |
| 128 | DnaJ C268A | $10.30 \pm 0.15$               | $43.80 \pm 0.77$                |

129

130 \*5  $\mu\text{M}$  of the indicated proteins were used to measure zinc and thiol content.

131

132 **Table S3. Bacterial strains used in this study.**

| 133 | Strain               | Relevant characteristics                                                                                         | Reference  |
|-----|----------------------|------------------------------------------------------------------------------------------------------------------|------------|
| 134 | <b>Salmonella</b>    |                                                                                                                  |            |
| 135 | 14028s               | wild-type of <i>S. Typhimurium</i>                                                                               | ATCC       |
| 136 | AV17142              | $\Delta dksA::FRT$ (pWSK29::TAP)                                                                                 | lab strain |
| 137 | AV10342              | $\Delta dksA::FRT$ (pWSK29::dksA::TAP)                                                                           | lab strain |
| 138 | AV17180              | $\Delta dksA::FRT$ , <i>rpoC</i> ::6His::Cm                                                                      | This study |
| 139 | AV08016              | <i>dksA</i> ::3xflag::FRT                                                                                        | lab strain |
| 140 | AV15188              | <i>dksA</i> ::3xflag::FRT, $\Delta dnaJ$ ::Km                                                                    | This study |
| 141 | AV17134              | <i>dksA</i> ::1xflag::Cm                                                                                         | This study |
| 142 | AV17143              | <i>dksA</i> K98A::1xflag::Cm                                                                                     | This study |
| 143 | AV15172              | $\Delta dnaJ$ ::Km                                                                                               | This study |
| 144 | AV15184              | $\Delta dnaJ$ ::Km (pWSK29::dnaJ)                                                                                | This study |
| 145 | AV16068              | $\Delta dnaJ$ ::Km (pWSK29::dnaJ C186H)                                                                          | This study |
| 146 | AV17055              | $\Delta dnaJ$ ::Km (pWSK29::dnaJ C268A)                                                                          | This study |
| 147 | AV0663               | $\Delta relA$ ::FRT                                                                                              | (2)        |
| 148 | AV14005              | $\Delta relA$ ::FRT $\Delta spoT$ ::FRT                                                                          | (3)        |
| 149 |                      |                                                                                                                  |            |
| 150 | <b>E. coli</b>       |                                                                                                                  |            |
| 151 | DH5 $\alpha$         | <i>supE44</i> $\Delta lacU169$ ( $\phi 80$ <i>lacZ</i> $\Delta M15$ ) <i>hsdR17</i> <i>recA1</i>                 | (4)        |
| 152 |                      | <i>endA1</i> <i>gyrA96</i> <i>thi-1</i> <i>relA1</i>                                                             |            |
| 153 | BTH101               | F-, <i>cya-99</i> , <i>araD139</i> , <i>galE15</i> , <i>galK16</i> , <i>rpsL1</i> (Str <sup>r</sup> ),           | Euromedex  |
| 154 |                      | <i>hsdR2</i> , <i>mcrA1</i> , <i>mcrB1</i>                                                                       |            |
| 155 | BL21(DE3)            | <i>fhuA2</i> [ <i>lon</i> ] <i>ompT</i> <i>gal</i> ( $\lambda$ DE3) [ <i>dcm</i> ] $\Delta$ <i>hsdS</i>          | Invitrogen |
| 156 |                      | $\lambda$ DE3 = $\lambda$ <i>sBamHlo</i> $\Delta$ <i>EcoRI-B</i>                                                 |            |
| 157 |                      | <i>int</i> ::( <i>lacl</i> :: <i>PlacUV5</i> ::T7 <i>gene1</i> <i>i21</i> $\Delta$ <i>nin5</i> )                 |            |
| 158 | Origami B(DE3) pLysS | <i>E. coli</i> K12 F- <i>ompT</i> <i>hsdSB</i> (rB- mB-) <i>gal</i> <i>dcm</i> <i>lacY1</i>                      | Novagen    |
| 159 |                      | <i>aphC</i> (DE3) <i>gor522</i> ::Tn10 <i>trxB</i> pLysS (Cm <sup>r</sup> , Km <sup>r</sup> , Tet <sup>r</sup> ) |            |
| 160 | AV15092              | HTH101 (pKT25 :: <i>dksA</i> , pUT18C)                                                                           | This study |
| 161 | AV15093              | HTH101 (pKT25 :: <i>dksA</i> , pUT18C :: <i>stpA</i> )                                                           | This study |
| 162 | AV15094              | HTH101 (pKT25 :: <i>dksA</i> , pUT18C :: <i>hupA</i> )                                                           | This study |
| 163 | AV15095              | HTH101 (pKT25 :: <i>dksA</i> , pUT18C :: <i>tig</i> )                                                            | This study |
| 164 | AV15096              | HTH101 (pKT25 :: <i>dksA</i> , pUT18C :: <i>dnaJ</i> )                                                           | This study |
| 165 | AV15099              | HTH101 (pKT25 :: <i>rpoA</i> , pUT18C)                                                                           | This study |
| 166 | AV15100              | HTH101 (pKT25 :: <i>rpoA</i> , pUT18C :: <i>stpA</i> )                                                           | This study |
| 167 | AV15101              | HTH101 (pKT25 :: <i>rpoA</i> , pUT18C :: <i>hupA</i> )                                                           | This study |
| 168 | AV15102              | HTH101 (pKT25 :: <i>rpoA</i> , pUT18C :: <i>tig</i> )                                                            | This study |
| 169 | AV15103              | HTH101 (pKT25 :: <i>rpoA</i> , pUT18C :: <i>dnaJ</i> )                                                           | This study |

|     |         |                                        |            |
|-----|---------|----------------------------------------|------------|
| 170 | AV10267 | BL21(DE3) (pGEX6p-DksA)                | (5)        |
| 171 | AV10266 | BL21(DE3) (pGEX6p-DksA C114S)          | (5)        |
| 172 | AV10258 | BL21(DE3) (pGEX6p-DksA C135S)          | (5)        |
| 173 | AV17115 | BL21(DE3) (pGEX6p-DksA all C to S)     | (5)        |
| 174 | AV18004 | BL21(DE3) (pGEX6p-DksA 146)            | This study |
| 175 | AV18005 | BL21(DE3) (pGEX6p-DksA 141)            | This study |
| 176 | AV18006 | BL21(DE3) (pGEX6p-DksA 136)            | This study |
| 177 | AV18007 | BL21(DE3) (pGEX6p-DksA 131)            | This study |
| 178 | AV17165 | BL21(DE3) (pGEX6p-DksA K98A)           | This study |
| 179 | AV17014 | BL21(DE3) (pET22b-DnaJ)                | This study |
| 180 | AV17138 | BL21(DE3) (pET22b-Tig)                 | This study |
| 181 | AV17015 | Origami B(DE3) pLysS (pET22b-DnaJ-I)   | This study |
| 182 | AV17018 | Origami B(DE3) pLysS (pET22b-DnaJ-II)  | This study |
| 183 | AV17019 | Origami B(DE3) pLysS (pET22b-DnaJ-III) | This study |
| 184 | AV17200 | Origami B(DE3) pLysS (pET22b-DnaJ-IV)  | This study |
| 185 | AV17203 | Origami B(DE3) pLysS (pET22b-DnaJ-V)   | This study |
| 186 | AV17204 | Origami B(DE3) pLysS (pET22b-DnaJ-VI)  | This study |
| 187 | AV17139 | BL21(DE3) (pET22b-DnaJ C186H)          | This study |
| 188 | AV18117 | BL21(DE3) (pET22b-DnaJ C167H)          | This study |
| 189 | AV17140 | BL21(DE3) (pET22b-DnaJ C268A)          | This study |

---

190

191



192 **Table S4. Plasmids used in this study.**

| 193 | Plasmid                   | Relevant characteristics                                                                  | Reference  |
|-----|---------------------------|-------------------------------------------------------------------------------------------|------------|
| 194 | pET-22b(+)                | <i>ori</i> pBR322, C-terminal His·Taq fusion vector, Pn <sup>r</sup>                      | Novagen    |
| 195 | pET22b::DnaJ              | pET-22b(+) + 1.1-kb DNA containing <i>dnaJ</i> , Pn <sup>r</sup>                          | This study |
| 196 | pET22b::DnaJ-I            | pET-22b(+) + 0.37-kb DNA containing truncated <i>dnaJ</i> , Pn <sup>r</sup>               | This study |
| 197 | pET22b::DnaJ-II           | pET-22b(+) + 0.59-kb DNA containing truncated <i>dnaJ</i> , Pn <sup>r</sup>               | This study |
| 198 | pET22b::DnaJ-III          | pET-22b(+) + 0.64-kb DNA containing truncated <i>dnaJ</i> , Pn <sup>r</sup>               | This study |
| 199 | pET22b::DnaJ-IV           | pET-22b(+) + 0.52-kb DNA containing truncated <i>dnaJ</i> , Pn <sup>r</sup>               | This study |
| 200 | pET22b::DnaJ-V            | pET-22b(+) + 0.68-kb DNA containing truncated <i>dnaJ</i> , Pn <sup>r</sup>               | This study |
| 201 | pET22b::DnaJ-VI           | pET-22b(+) + 0.79-kb DNA containing truncated <i>dnaJ</i> , Pn <sup>r</sup>               | This study |
| 202 | pET22b::DnaJ C167H        | pET-22b(+) + 1.1-kb DNA containing <i>dnaJ</i> C167H, Pn <sup>r</sup>                     | This study |
| 203 | pET22b::DnaJ C186H        | pET-22b(+) + 1.1-kb DNA containing <i>dnaJ</i> C186H, Pn <sup>r</sup>                     | This study |
| 204 | pET22b::DnaJ C268A        | pET-22b(+) + 1.1-kb DNA containing <i>dnaJ</i> C268A, Pn <sup>r</sup>                     | This study |
| 205 | pET22b::Tig               | pET-22b(+) + 1.30-kb DNA containing <i>tig</i> , Pn <sup>r</sup>                          | This study |
| 206 | pET22b::RpoC              | pET-22b(+) + 4.23-kb DNA containing <i>rpoC</i> , Pn <sup>r</sup>                         | This study |
| 207 | pGEX6p                    | GST fusion expression vector, Pn <sup>r</sup>                                             | (6)        |
| 208 | pGEX6::dksA               | pGEX6p + 454-bp DNA containing <i>dksA</i> , Pn <sup>r</sup>                              | (5)        |
| 209 | pGEX6::dksA C114S         | pGEX6p + 0.45-kb DNA containing <i>dksA</i> C114S, Pn <sup>r</sup>                        | (5)        |
| 210 | pGEX6::dksA C135S         | pGEX6p + 0.45-kb DNA containing <i>dksA</i> C135S, Pn <sup>r</sup>                        | (5)        |
| 211 | pGEX6::dksA ΔC            | pGEX6p + 0.45-kb DNA containing <i>dksA</i> C114S C117S                                   | This study |
| 212 |                           | C135S C138S, Pn <sup>r</sup>                                                              |            |
| 213 | pGEX6::dksA 146           | pGEX6p + 439-bp DNA containing the C-terminal truncated                                   | This study |
| 214 |                           | <i>dksA</i> (Δ5 amino acid), Pn <sup>r</sup>                                              |            |
| 215 | pGEX6::dksA 141           | pGEX6p + 424-bp DNA containing the C-terminal truncated                                   | This study |
| 216 |                           | <i>dksA</i> (Δ10 amino acid), Pn <sup>r</sup>                                             |            |
| 217 | pGEX6::dksA 136           | pGEX6p + 409-bp DNA containing the C-terminal truncated                                   | This study |
| 218 |                           | <i>dksA</i> (Δ15 amino acid), Pn <sup>r</sup>                                             |            |
| 219 | pGEX6::dksA 131           | pGEX6p + 409-bp DNA containing the C-terminal truncated                                   | This study |
| 220 |                           | <i>dksA</i> (Δ20 amino acid), Pn <sup>r</sup>                                             |            |
| 221 | pGEX6::dksA K98A          | pGEX6p + 0.45-kb DNA containing <i>dksA</i> K98A, Pn <sup>r</sup>                         | This study |
| 222 | pKD3                      | template vector for FRT-flanked Cm <sup>r</sup> cassette, Cm <sup>r</sup> Pn <sup>r</sup> | (7)        |
| 223 | pKD13                     | template vector for FRT-flanked Km <sup>r</sup> cassette, Km <sup>r</sup> Pn <sup>r</sup> | (7)        |
| 224 | pKT25                     | pSU40 derivative with T25 domain of CyaA,                                                 | Euromedex  |
| 225 |                           | MCS at the end of T25, Kan <sup>r</sup>                                                   |            |
| 226 | pKT25::dksA               | pKT25 plasmid with <i>cyaAT25-dksA</i> fusion, Kan <sup>r</sup>                           | This study |
| 227 | pKT25::rpoA               | pKT25 plasmid with <i>cyaAT25-rpoA</i> fusion, Kan <sup>r</sup>                           | This study |
| 228 | pBluescriptSK(+)          | Standard cloning vector 2958 bp, Pn <sup>r</sup>                                          | Stratagene |
| 229 | pSK::dksA::1xflag::Cm     | pSK(+) + 1.4-kb DNA containing <i>dksA::flag</i> , Cm <sup>r</sup> Pn <sup>r</sup>        | This study |
| 230 | pSK::dksAK98A::1xflag::Cm | pSK(+) + 1.4-kb DNA containing <i>dksAK98A::flag</i> , Cm <sup>r</sup> Pn <sup>r</sup>    | This study |

|     |                              |                                                                                          |            |
|-----|------------------------------|------------------------------------------------------------------------------------------|------------|
| 231 | pSK:: <i>rpoC</i> ::6His::Cm | pBluescriptKS(+) + 1.89-kb DNA containing 539 bp C-terminal                              | This study |
| 232 |                              | <i>rpoC</i> fused with 6His + 1,035 bp Cm <sup>r</sup> cassette + 318 bp <i>rpoC</i>     |            |
| 233 |                              | flanking region to construct <i>rpoC</i> ::6His::Cm, Cm <sup>r</sup> and Pn <sup>r</sup> |            |
| 234 | pTIM                         | bla <i>rrnB</i> & <i>rpoC</i> term pBluescript                                           | (8)        |
| 235 | pTIM- <i>livJ</i>            | pTim + 1.34-kb DNA containing <i>PlivJ</i> (-240) and <i>livJ</i>                        | This study |
| 236 | pTIM- <i>rpsM</i>            | pTim + 0.56-kb DNA containing <i>PrpsM</i> (-203) and <i>rpsM</i>                        | This study |
| 237 | pUT18C                       | pUC19 derivative with T18 domain of <i>CyaA</i> ,                                        | Euromedex  |
| 238 |                              | MCS at the 3' start of T18, Pn <sup>r</sup>                                              |            |
| 239 | pUT18C:: <i>dnaJ</i>         | pUT18 plasmid with <i>dnaJ-cyaAT18</i> fusion, Pn <sup>r</sup>                           | This study |
| 240 | pUT18C:: <i>hupA</i>         | pUT18 plasmid with <i>hupA-cyaAT18</i> fusion, Pn <sup>r</sup>                           | This study |
| 241 | pUT18C:: <i>stpA</i>         | pUT18 plasmid with <i>stpA-cyaAT18</i> fusion, Pn <sup>r</sup>                           | This study |
| 242 | pUT18C:: <i>tig</i>          | pUT18 plasmid with <i>tig-cyaAT18</i> fusion, Pn <sup>r</sup>                            | This study |
| 243 | pWSK29                       | low copy plasmid, <i>lacZ</i> $\alpha$ , Pn <sup>r</sup>                                 | (9)        |
| 244 | pWSK29::TAP                  | pWSK29 + 0.42-kb DNA containing TAP, Pn <sup>r</sup>                                     | (10)       |
| 245 | pWSK29:: <i>dksA</i> ::TAP   | pWSK29 + 1.07-kb DNA containing <i>pdksA::dksA</i> ::TAP, Pn <sup>r</sup>                | This study |
| 246 | pWSK29:: <i>dnaJ</i>         | pWSK29 + 1.49-kb DNA containing <i>pdnaK::dnaJ</i> , Pn <sup>r</sup>                     | This study |
| 247 | pWSK29:: <i>dnaJ</i> C186H   | pWSK29 + 1.49-kb DNA containing <i>pdnaK::dnaJ</i> C186H, Pn <sup>r</sup>                | This study |
| 248 | pWSK29:: <i>dnaJ</i> C268A   | pWSK29 + 1.49-kb DNA containing <i>pdnaK::dnaJ</i> C268A, Pn <sup>r</sup>                | This study |
| 249 |                              |                                                                                          |            |



pUT18C::*tig* R: GAGCTCATTAAGAAATCATCCAGAGATTTC  
 F: TCTAGAAAGTTTCAGTTGAAACCACTCAG  
 R: GAGCTCGCCTGCTGGTTCATCAGCTC

pWSK29::TAP F: AAGAATTCATGAAGCGACGATGGAAAAAGAATTTTCATAGC  
 R: AACTGCAGTTATTCTTTGTTGAATTTGTTATCCGCTTTCGGT

pWSK29::*dksA*::TAP F: ATACTCGAGCGAACCAGTACCCATAAC  
 R: ATCGAATTCACCCGCCATCTGTTTTTCG

pWSK29::*dnaJ*  
 1. *pdnaK* DNA F: CCGCTCGAGGCAGGCCGACGGAAATCGTTAACAC  
 fragment R: GAATTCCCTAAACGTCTCCACTAAAAATTCGGTCATCAT  
 2. *dnaJ* DNA fragment F: GAATTCATGGCGAAAAGAGATTACTACGAGATTTTAGGCGT  
 R: CGCGGATCCCTTAGCGAGTCAAATCGTCAAAGAATTTTTTCACG

### Point mutations

*dksA* K98A F: CCGTGAGCGCAAACTGATCAAAGCGATCGAGAAGACGCTG  
 R: CAGCGTCTTCTCGATCGTTTTGATCAGTTTGCCTCACGG

*dnaJ* C167H F: CCTGACCAGAACCATGATGGGTCCGACAGGTTTGCG  
 R: CGCAAACCTGTCCGACCCATCATGGTTCTGGTCAGG

*dnaJ* C186H F: CCCTGACAGTGTGGGTGGGTCTGCTGTACAGC  
 R: GCTGTACAGCAGACCCACCCACACTGTCAGGG

*dnaJ* C268A F: CAATAATCTTTATGCAGAAGTGCCGATCAACTTTG  
 R: GATCGGCACTTCTGCATAAAGATTATTGCC

### Truncated DksA proteins

*dksA* 146 F: ATCGGATCCATGCAAGAAGGGCAAACCGTAAAAC  
 R: ATCGAATTC**TT**ATTCGCGAATTTTCAGCCAGCGTTTTG

*dksA* 141 F: ATCGGATCCATGCAAGAAGGGCAAACCGTAAAAC  
 R: ATCGAATTC**TT**ACAGCGTTTTGTCAGTCGATGCA

*dksA* 136 F: ATCGGATCCATGCAAGAAGGGCAAACCGTAAAAC  
 R: ATCGAATTC**TT**AGATGCACAGATCGGCTGTTGG

*dksA* 131 F: ATCGGATCCATGCAAGAAGGGCAAACCGTAAAAC  
 R: ATCGAATTC**TT**ATGTTGGACGCGCTTCCAG

### Real time qRT-PCR

*rpoD* F: GTGGCTTGCAATTCCTTGAT  
 R: AGCATCTGGCGAGAAATA  
 Probe: 6-FAM-ATAAGTTCGAATACCGTCGCG-3BHQ-1

*livJ* F: CGCAGGGCTGAAAACCCA  
 R: CACACGAATGCGCCGCTA  
 Probe: 6-FAM-TCAGCGGAAGGCTTACTGGTC-3BHQ-1

*hisG* F: CAGGCCGTTTAAGCGATGATTCACGAG  
 R: AATACCGAGATCGACCACGCCATCC  
 Probe: 6-FAM-ATCGGCATGTTTTCCGCCATCGCAATCAGG-3BHQ-1

### In vitro transcription

*livJ* F: GGAATTC~~CA~~ATACGTTTGCCCGATGG  
 R: TGC~~ACT~~GCAGTGCATATTTACCGCGACGAGC

*hisG* F: TAAGGCGTAAAAGTGGTTTAG  
 R: CACGCGCAGGATATCAATCGGC

253 \*\*\* Stop codons are marked in bold.  
254  
255

256 **Supplementary figure legends**

257

258 **Fig. S1. Recombinant DnaJ and DksA proteins and biochemical pull-down assay.**

259 Protein-protein interactions were evaluated in (A) a bacterial two-hybrid system in which T25

260 and T18 fragments of adenylate cyclase are fused to bait and prey proteins, respectively,

261 and by (B) biochemical pull-down assays using recombinant proteins in the absence of DTT.

262 GST and GST-DksA proteins were used as bait, whereas DnaJ and Tig were used as prey.

263 DnaJ in the pull-downs assays was detected by Western blotting. (C, D, E) Input proteins

264 used in the biochemical pull-down assays corresponding to Fig. S1B, 1C and 1D as shown

265 by Coomassie-stained SDS-PAGE gels.

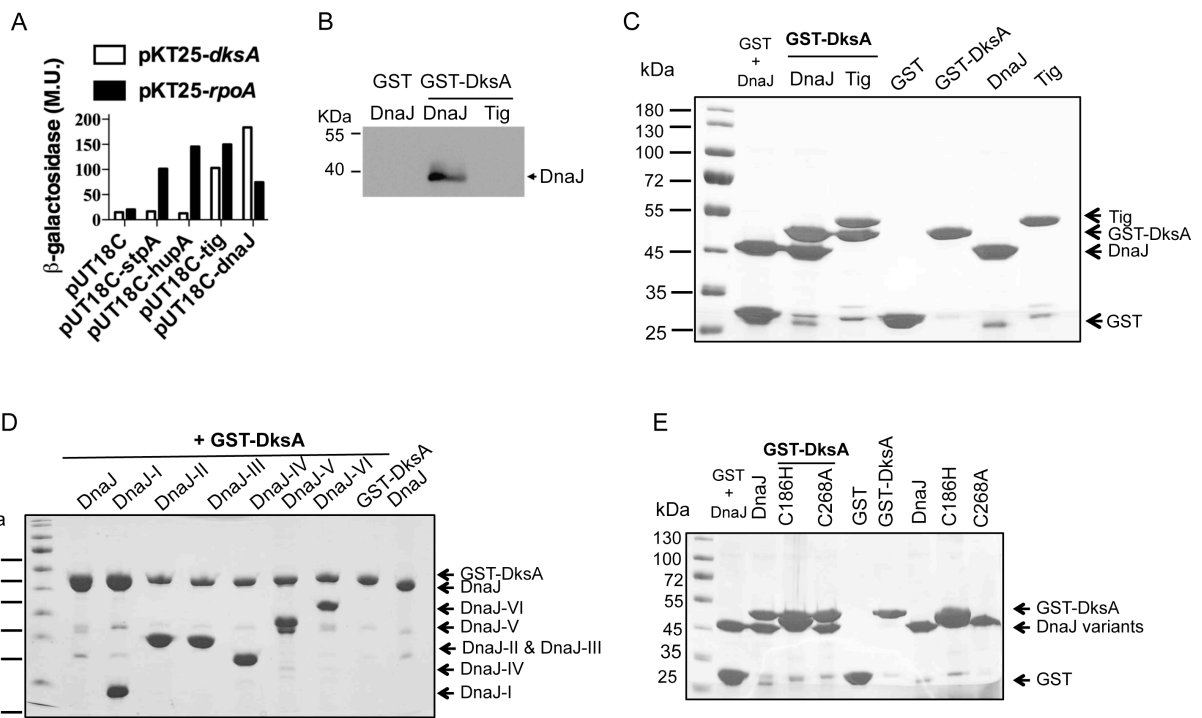

266

267

268

269 **Fig. S2. Zinc content of recombinant DksA variants.** (A-C) Input proteins (5  $\mu$ g) used for  
 270 the pull-down assays shown in Fig. 2A, D and E were visualized in Coomassie-stained SDS-  
 271 PAGE gels. (D) Purified DksA proteins used for CD analysis shown in **Fig. 2G**. (E)  
 272 Determination of zinc content from 25  $\mu$ M of recombinant, WT DksA and truncated variants  
 273 after treatment with 50-1000  $\mu$ M  $H_2O_2$  as measured spectrophotometrically with the zinc  
 274 chelator PAR using regression analysis of standard curves prepared with  $ZnCl_2$ .

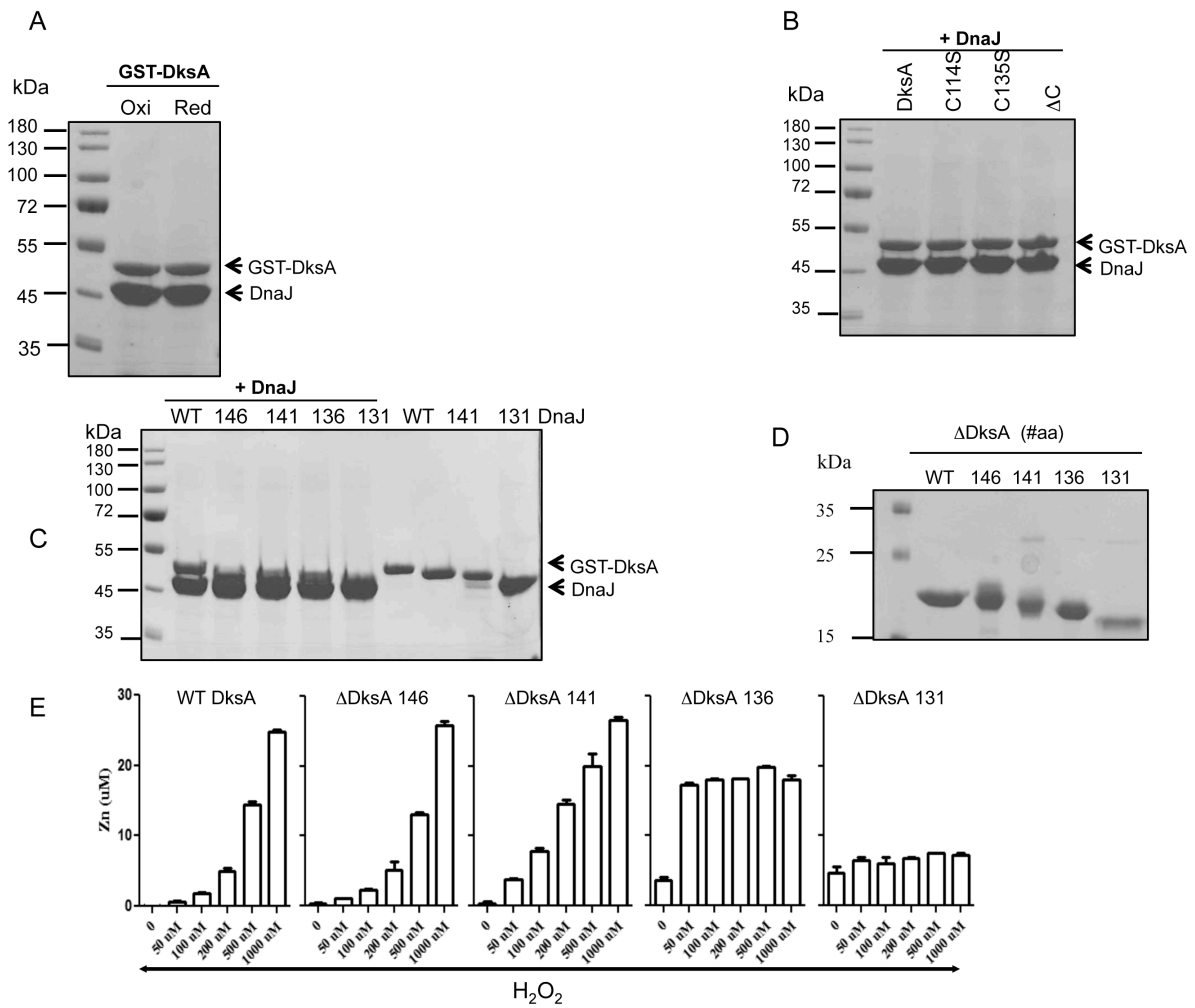

275

276

277

278 **Fig. S3. Characterization of recombinant DnaJ and determination of DksA**  
279 **remetallation and redox state in aerobic cultures.** (A) Thiol content and zinc release after  
280 treatment of 3.33  $\mu\text{M}$  DnaJ recombinant protein with increasing concentrations of  $\text{H}_2\text{O}_2$  or  
281  $\text{ONOO}^-$ . Thiol content, as calculated from the molar extinction coefficient of TNB, was  
282 measured spectrophotometrically by following the reaction of sulfhydryl groups with DTNB.  
283 The amount of thiol detected in untreated samples corresponds to about 2 moles per mole  
284 of protein, likely reflecting modification of the two cysteines in the C-terminal domain.  
285 Addition of up to 10 molar excess of  $\text{H}_2\text{O}_2$  or  $\text{ONOO}^-$  did not change the estimated thiol  
286 content. Neither  $\text{H}_2\text{O}_2$  nor  $\text{ONOO}^-$  released zinc from DnaJ, as determined using PAR.  
287 Together these findings suggest that that cysteine residues in DnaJ site 1 and site 2 zinc  
288 fingers may be resistant to oxidants. (B) Thiol content and zinc release after 3.33  $\mu\text{M}$  of  
289 recombinant DnaJ were treated with increasing concentrations of urea. (C) Proteins used in  
290 the MS analysis done in **Fig. 3B** were visualized in SDS-PAGE gels stained with Coomassie  
291 Brilliant Blue. (D) Zinc release from: 1. zinc-containing DnaJ (DnaJ alone); 2. reduced, zinc-  
292 deficient DksA pre-incubated for 1 h at  $37^\circ\text{C}$  with an equimolar amount zinc-containing DnaJ  
293 (zinc<sup>neg</sup> DksA + DnaJ); 3. reduced, zinc-deficient DksA (zinc<sup>neg</sup> DksA) prepared by DTT  
294 reduction and desalting of DksA pre-treated with the sulfhydryl-reactive compound MMTS in  
295 the presence of the chelating agent DTPA; 4. reduced, zinc-containing DksA (zinc<sup>pos</sup> DksA).  
296 Zinc release was measured by spectrometry using the metallochromic indicator PAR  
297 following exposure of the samples to  $\text{ONOO}^-$  (570  $\mu\text{M}$  final) or urea (5.7 M final). Zinc  
298 concentrations were calculated from standard curves prepared using  $\text{ZnCl}_2$  standards in the  
299 presence of  $\text{ONOO}^-$  or urea, as appropriate. Oxidation by  $\text{ONOO}^-$  elicits zinc release from  
300 DksA, but not DnaJ. Urea elicits zinc release from both DksA and DnaJ. Upon exposure to  
301  $\text{ONOO}^-$ , minimal zinc release was observed from the zinc<sup>neg</sup> DksA + DnaJ sample, indicating  
302 that DnaJ did not remetallate zinc-deficient DksA under the experimental conditions  
303 examined. (E) Redox state of thiol groups in DksA cysteine residues in aerobic, log phase  
304 *Salmonella* was evaluated by Western blot analysis after derivatization with the alkylation



305 agent AMS. Immunoblot analysis was performed to detect DksA-FLAG proteins.

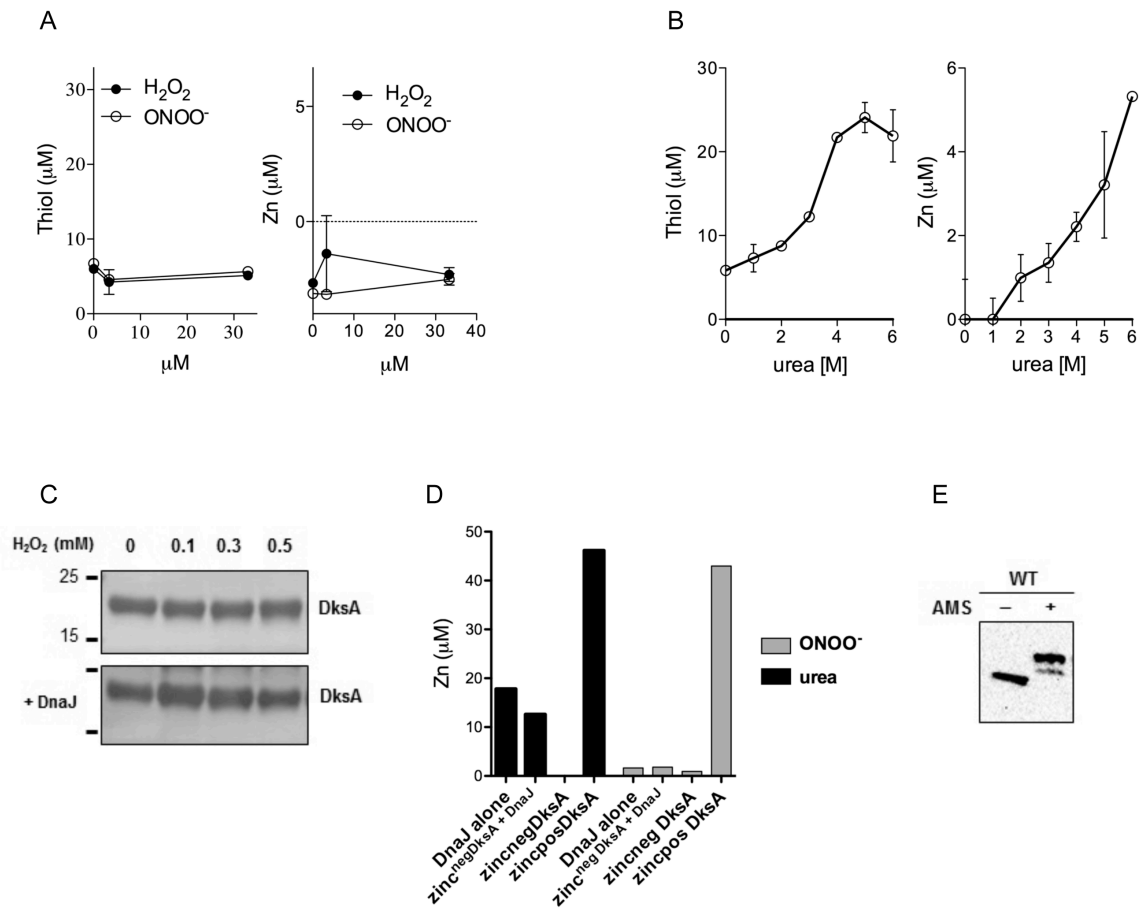

306  
307

308

309

310 **Fig. S4. *In-gel* digestion-HPLC-MS and redox analysis of DksA.** (A) Cysteine containing  
 311 peptides, T<sub>18-19</sub> and T<sub>20-21</sub>, in both oxidized or reduced states were analyzed by HPLC-  
 312 Enhanced Resolution MS. Upper panel shows a representative extracted ion current  
 313 chromatogram for Z = +2 (red) and Z = +3 (blue) corresponding ions for each peptide.  
 314 *Enhanced resolution* mass spectra for each ion are shown in lower panels. (B) Redox state  
 315 of thiol groups in DksA cysteine residues in anaerobic, log phase *Salmonella* was evaluated  
 316 by Western blot analysis after derivatization with the alkylation agent AMS as described in  
 317 **Fig. S3.** Some of the bacterial cultures were treated for the indicated times with 1 or 10 μM  
 318 H<sub>2</sub>O<sub>2</sub>.

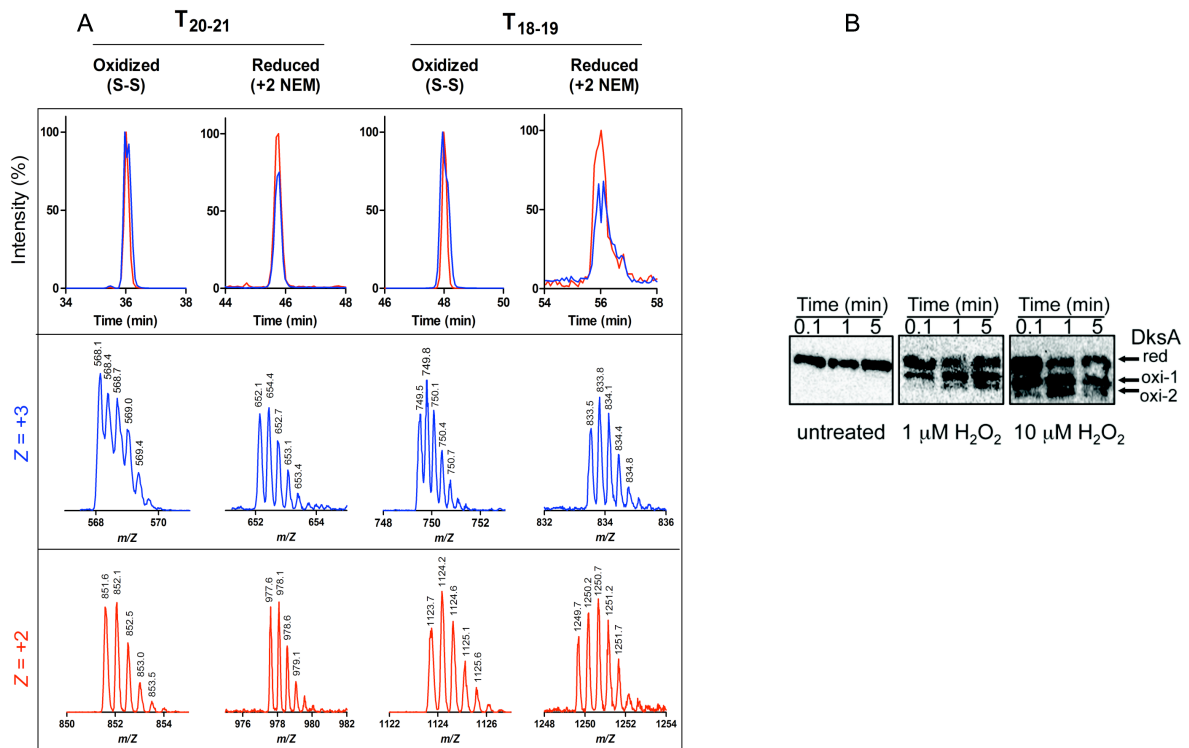

322 **Fig. S5. Characterization of *Salmonella* strains expressing *dnaJ* variants.** (A) Growth of  
 323 WT,  $\Delta dnaJ$ , and complemented *Salmonella* strains in LB broth at 37 or 45°C. (B) Growth of  
 324 WT,  $\Delta dksA$ , and  $\Delta dnaJ$  *Salmonella* in EG minimal media as determined  
 325 spectrophotometrically by following OD<sub>600</sub>. (C) Immunoblot of DksA-3xFLAG and DnaK in  
 326 lysates (20  $\mu$ g/lane) obtained from the indicated *Salmonella* strains grown to log phase in LB  
 327 broth. Select cultures (+) were treated with 1 mM H<sub>2</sub>O<sub>2</sub> for 30 min. (D) DnaJ expression in  
 328 the indicated *Salmonella* strains grown to exponential phase in LB broth as determined by  
 329 immunoblot analysis. DnaK is shown for comparison. The results are representative of 2-3  
 330 independent experiments.

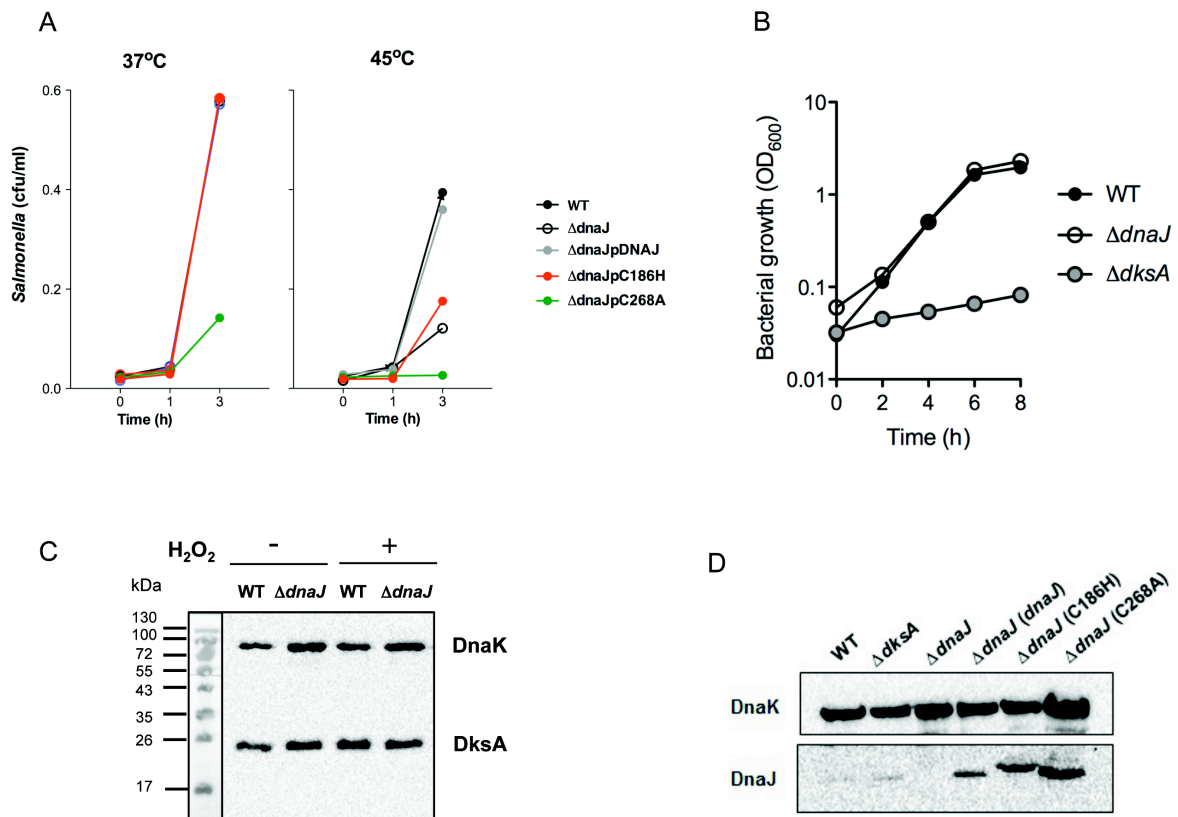

331

332

333 **Fig. S6. Transcription of *hisG* in *Salmonella* and purification of RNA polymerase from**  
 334 ***Salmonella*.** (A and B) Abundance of *hisG* transcripts in anaerobically grown *Salmonella* left  
 335 untreated or exposed to 1 or 10  $\mu\text{M}$   $\text{H}_2\text{O}_2$ . The abundance of *hisG* transcripts was  
 336 normalized to the housekeeping gene *rpoD*. \*\*\* $p < 0.001$  compared to untreated controls as  
 337 determined by One-way ANOVA. Data are expressed as mean  $\pm$  SD from 4 independent  
 338 experiments. (C) Growth of anaerobic *Salmonella* in E salts minimum media supplemented  
 339 with glucose and casamino acids in the presence of 1 or 10  $\mu\text{M}$   $\text{H}_2\text{O}_2$ . (D) Purified  
 340 *Salmonella* RNA polymerase holoenzyme was examined by 8% SDS-PAGE and Coomassie  
 341 Brilliant Blue staining. *E. coli* RNA polymerase holoenzyme was included for comparison.

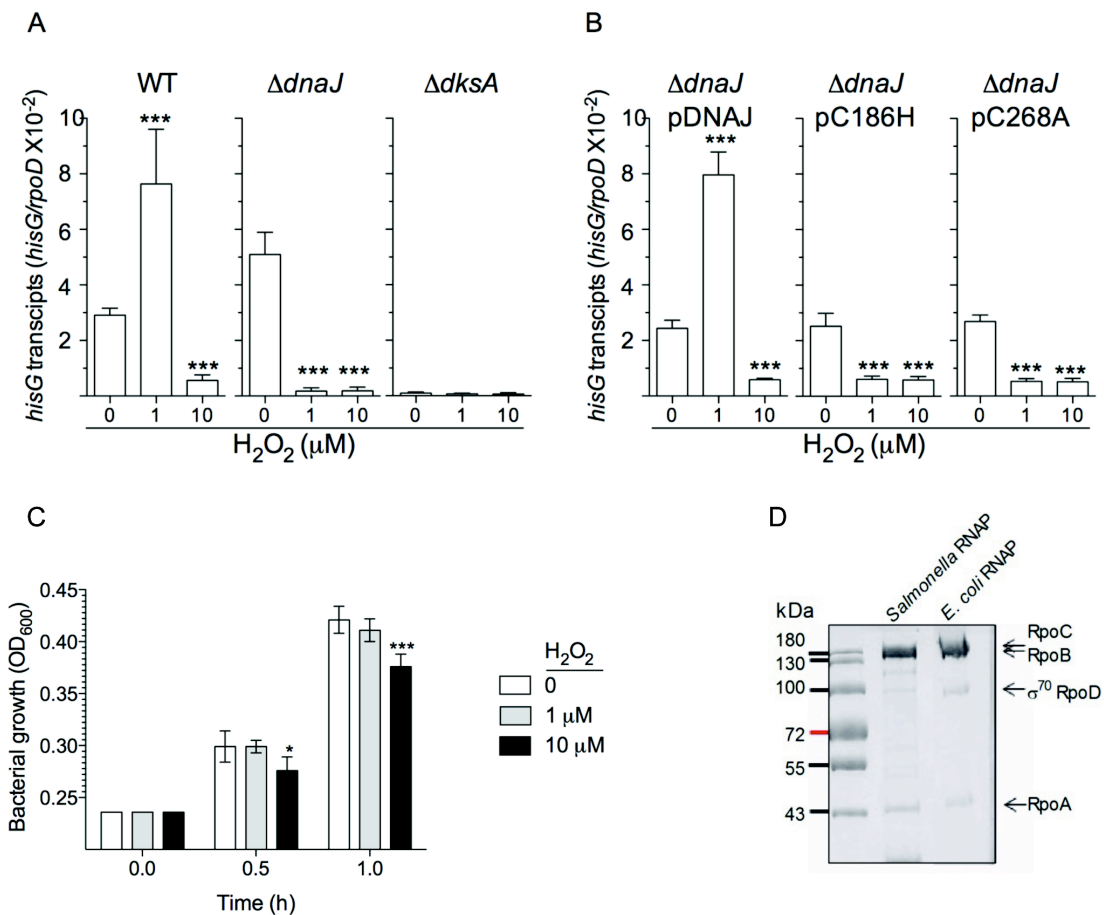

342

343

344 **Fig. S7. Effects of tetracycline on H<sub>2</sub>O<sub>2</sub>-stimulated ppGpp synthesis.** (A) TLC  
 345 autoradiogram of <sup>32</sup>P-labeled nucleotides in WT *Salmonella* treated with 70 μg/ml  
 346 tetracycline for 3 min before the addition of 25 μM H<sub>2</sub>O<sub>2</sub> for 1 min. The blot shown is  
 347 representative of 2 independent experiments. (B) DksA-3xFLAG, DnaJ and DnaK proteins  
 348 were examined by immunoblot in the indicated *Salmonella* strains that had been grown to  
 349 log phase. (C) Recombinant DksA K98A protein used in **Fig. 6G**.

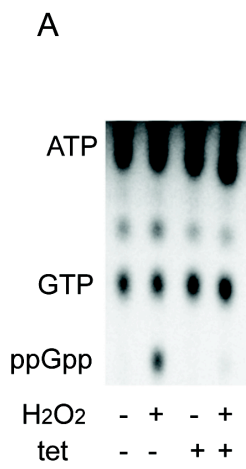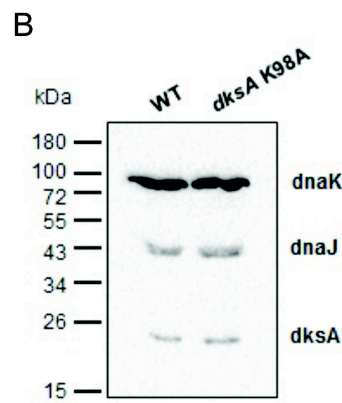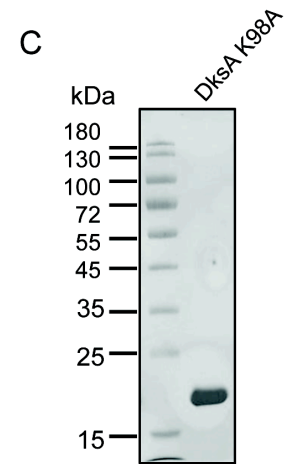

350

351

References:

352  
353  
354  
355  
356  
357  
358  
359  
360  
361  
362  
363  
364  
365  
366  
367  
368  
369  
370  
371  
372  
373  
374  
375  
376  
377  
378  
379

1. Radi R, Beckman JS, Bush KM, & Freeman BA (1991) Peroxynitrite oxidation of sulfhydryls. The cytotoxic potential of superoxide and nitric oxide. *J Biol Chem* 266:4244-4250.
2. Fitzsimmons LF, Liu L, Kim JS, Jones-Carson J, & Vazquez-Torres A (2018) *Salmonella* Reprograms Nucleotide Metabolism in Its Adaptation to Nitrosative Stress. *MBio* 9: e00211-18.
3. Henard CA, Bourret TJ, Song M, & Vazquez-Torres A (2010) Control of redox balance by the stringent response regulatory protein promotes antioxidant defenses of *Salmonella*. *J Biol Chem* 285:36785-36793.
4. Hanahan D (1983) Studies on transformation of *Escherichia coli* with plasmids. *J Mol Biol* 166:557-580.
5. Henard CA, *et al.* (2014) The 4-cysteine zinc-finger motif of the RNA polymerase regulator DksA serves as a thiol switch for sensing oxidative and nitrosative stress. *Mol Microbiol* 91:790-804.
6. Smith DB & Johnson KS (1988) Single-step purification of polypeptides expressed in *Escherichia coli* as fusions with glutathione S-transferase. *Gene* 67:31-40.
7. Datsenko KA & Wanner BL (2000) One-step inactivation of chromosomal genes in *Escherichia coli* K-12 using PCR products. *Proc Natl Acad Sci U S A* 97:6640-6645.
8. Tapscott T, *et al.* (2018) Guanosine tetraphosphate relieves the negative regulation of *Salmonella* pathogenicity island-2 gene transcription exerted by the AT-rich *ssrA* discriminator region. *Sci Rep* 8:9465.
9. Wang RF & Kushner SR (1991) Construction of versatile low-copy-number vectors for cloning, sequencing and gene expression in *Escherichia coli*. *Gene* 100:195-199.
10. Song M, Kim JS, Liu L, Husain M, & Vazquez-Torres A (2016) Antioxidant Defense by Thioredoxin Can Occur Independently of Canonical Thiol-Disulfide Oxidoreductase Enzymatic Activity. *Cell Rep* 14:2901-2911.
